# Supplementary material for: A Potential Health Risk to Occupational User from Exposure to Biocidal Active Chemicals
Source: MDPI journal article supplement (doi:10.3390/ijerph17238770), 2020-11-25
Supplement: s1 [file s1]

# Supporting Information(SI) 1. Questionnaire of interview-survey to occupational workers

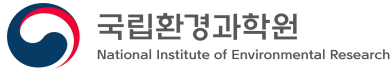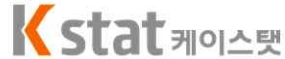

- research institute : National Institute of Environmental Research
- survey company : K-STAT research

■ in accordance with article 33 of the statistical law, the contents you respond to are strictly confidential and promise not to be used for purpose other than statistical analysis.

## I. Demographic information

\* this is what the interviewer enters.

SQ1. where are you living, city, province?

- ① seoul    ② pusan    ③ daegu    ④ incheron    ⑤ kwangju    ⑥ daejun
- ⑦ wolsan    ⑧ kyungi-do    ⑨ kwangwon-do    ⑩ chungbuk-do    ⑪ chungnam-do
- ⑫ Junbuk-do    ⑬ junnam-do    ⑭ kyungbuk-do    ⑮ kyungnam-do    ⑯ Jeju-do

SQ2. what is your age? \_\_\_\_\_ years

SQ2-1. ages detail

- ① 19year~29year    ② 30year    ③ 40year    ④ 50year +

SQ3. sex    ① male    ② female

\* this is what the interviewer enters.

SQ4. occupational category of respondent, choose occupation.

| 업종                                             | 직업군                                                     | 업종                                                       | 직업군                                         |
|------------------------------------------------|---------------------------------------------------------|----------------------------------------------------------|---------------------------------------------|
| Agriculture occupation/<br>Forestry occupation | Landscape worker                                        | Medical service related business/Health service business | dental doctor                               |
|                                                | 채소 및 특용작물 재배원                                           |                                                          | pharmacy worker                             |
|                                                | Crop plantation worker                                  |                                                          | nurse                                       |
|                                                | 원예작물 재배원                                                |                                                          | 영양사                                         |
|                                                | 조경원                                                     |                                                          | 임상병리사                                       |
|                                                | 조림 산림경영인 및 벌목원                                          |                                                          | x-ray worker                                |
|                                                | Forestry-related employee                               |                                                          | 치과기공사                                       |
|                                                | 제분 및 도정 관련 기계 조작원                                       |                                                          | 치과위생사                                       |
|                                                | 곡물가공 제품 기계 조작원                                          |                                                          | 재활공학 기사                                     |
|                                                | Agricultural machinery operation employee               |                                                          | 물리 및 작업 치료사                                 |
| Fisheries occupation                           | 농림-어업 관련 단순 종사원                                         | 임상심리사                                                    | 임상심리사                                       |
|                                                | 양식원                                                     | Health service business                                  | Health service business                     |
|                                                | Fishery                                                 | 응급 구조사                                                   | 응급 구조사                                      |
| Livestock occupation                           | Fishing-related machinery operation employee            | 위생사                                                      | 위생사                                         |
|                                                | 농림-어업 관련 단순 종사원                                         | 의무 기록사                                                   | 의무 기록사                                      |
|                                                | Dairy worker                                            | 간호조무사                                                    | 간호조무사                                       |
| Food cooking and food sales business           | Livestock breeder                                       | Fabric production and sales business                     | 패턴사                                         |
|                                                | Livestock industry-related machinery operation employee |                                                          | 재단사                                         |
|                                                | 육류-어패류 및 낙농품 가공 기계 조작원                                  |                                                          | 채봉사                                         |
|                                                | Food making & processing related employee               |                                                          | 제화원                                         |
|                                                | Chef & cook                                             |                                                          | Textile & leather processing worker         |
|                                                | korean food cook                                        |                                                          | 한복 제조원                                      |
|                                                | chinese food cook                                       |                                                          | 양장 및 양복 제조원                                 |
|                                                | western food cook                                       |                                                          | 모피 및 가죽 의복 제조원                              |
|                                                | japanese food cook                                      |                                                          | 의복-가죽 및 모피 수선원                              |
|                                                | beverage cook                                           |                                                          | 기타 의복 제조 관련 기능 종사원                          |
|                                                | other food cook                                         |                                                          | 섬유 제조 기계 조작원                                |
|                                                | bakery cook & worker                                    |                                                          | Ironing-related worker                      |
|                                                | korean cake cook                                        |                                                          | shoes making worker                         |
|                                                | meat managing worker                                    |                                                          | Laundry-related worker                      |
|                                                | 식품 및 담배 등급원                                             |                                                          | Funeral business, Companion animal business |
| side food cook                                 | 장례 상담원 및 장례 지도사                                         |                                                          |                                             |
| 기타 식품가공 관련 종사원                                 | Pet beauty & care-related worker                        |                                                          |                                             |
| 음료 제조 관련 기계 조작원                                | Children care business                                  | Kindergarten teacher                                     |                                             |
| Food making machinery operation employee       |                                                         | Child care service worker                                |                                             |
| fast food cook                                 |                                                         | Child daycare teacher                                    |                                             |
| kitchen related worker                         |                                                         | 기타 돌봄 및 보건 서비스 종사원                                       |                                             |
| Medical service related business               |                                                         | Children's goods rental business worker                  |                                             |
| doctor                                         | Beauty/lodging/facility management business             | Skin care service worker                                 |                                             |
| oriental related doctor                        |                                                         | Accommodation staff                                      |                                             |
|                                                |                                                         | Facility management worker/Facility cleaner              |                                             |

from now on, I will ask you about the chemicals product you use in your workplace.

- please respond only to products used at work or workplace, excluding products used at home.
- please respond to your experience of using the product for the past year as of the date of the survey
- the total investigation time does not exceed 30 minutes.

## Part A. disinfectant – non-human hygiene disinfectant

A. Have you ever used for last 1year disinfectants in workplaces for past one year?

(살균제 중 귀하께서 지난 1년간 직장이나 일터에서 사용한 경험이 있는 제품을 모두 골라주세요.)

| NO | product category      | use experience | NO | product category      | use experience |
|----|-----------------------|----------------|----|-----------------------|----------------|
| 1  | For kitchen           | ① yes ② no     | 6  | For air-conditioner   | ① yes ② no     |
| 2  | For fungi in bathroom | ① yes ② no     | 7  | For children's goods  | ① yes ② no     |
| 3  | For drainage          | ① yes ② no     | 8  | For companion animals | ① yes ② no     |
| 4  | For toilet            | ① yes ② no     |    |                       |                |
| 5  | For multi-purpose     | ① yes ② no     |    |                       |                |

A1-1) 지금부터 지난 1년간 귀하께서 직장이나 일터에서 사용한 경험이 있다고 응답하신 **주방용 살균제**에 대해 여쭙겠습니다.

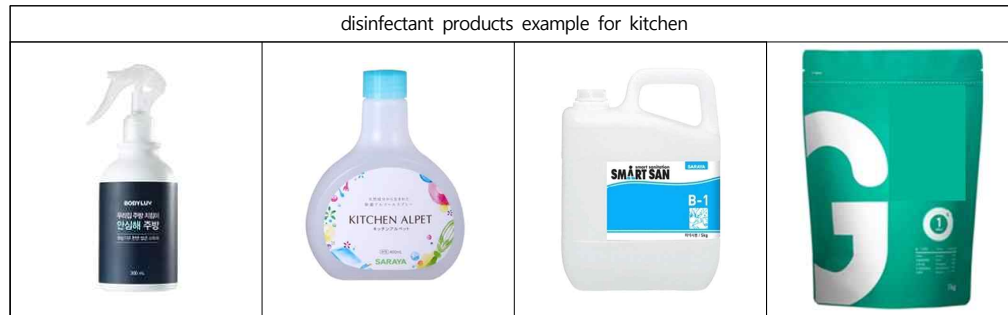

what kinds of disinfectant for kitchen have you used? choose every products (can choose multiple products)

| ① liquid type | ② spray type (trigger) | ③ powder type |
|---------------|------------------------|---------------|
|               |                        |               |

A1-2) what was products name you used? size, volume of products, write detail.

| application types of products | products name (manufacturing company)<br>[example : - ◇◇ toilet disinfectant (XX company)<br>- ●● disinfecting powder (XX company)] |
|-------------------------------|-------------------------------------------------------------------------------------------------------------------------------------|
| ① liquid type                 |                                                                                                                                     |
| ② spray type (trigger)        |                                                                                                                                     |
| ③ powder type                 |                                                                                                                                     |

A1-3) [use frequency] how often have you used? (A1-1에서 선택한 모든 제품 유형 필수 응답)

\* routine(normal) use in workplace or occupation place (일반적인 사용을 기준으로 응답해 주세요.)

| factors       | application types of products | times                             | use frequency |
|---------------|-------------------------------|-----------------------------------|---------------|
| use frequency | ① liquid type                 | ① week ② 1month ③ 6months ④ 1year | ( ) times     |
|               | ② spray type (trigger)        | ① week ② 1month ③ 6months ④ 1year | ( ) times     |
|               | ③ powder type                 | ① week ② 1month ③ 6months ④ 1year | ( ) times     |

A1-4) [time of use] (문1-1에서 선택한 모든 제품 유형 필수 응답)

\* time of use : mean exposure time from products, chemicals of products when you used products through inhalation and dermal contact

| questions                                                                                                                                                                      | application types      | factors                                           |
|--------------------------------------------------------------------------------------------------------------------------------------------------------------------------------|------------------------|---------------------------------------------------|
| mean time for using products per one time?<br>(average time taken for disinfecting after spraying and leaving as much disinfectant as desired and then finishing disinfection) | ① liquid type          | <input type="text"/> min <input type="text"/> sec |
| mean time for using products per one time?<br>(average time taken for disinfecting after spraying and leaving as much disinfectant as desired and then finishing disinfection) | ② spray type (trigger) | <input type="text"/> min <input type="text"/> sec |
| mean time for using products per one time?<br>(average time taken for disinfecting after using and leaving as much disinfectant as desired and then finishing disinfection)    | ③ powder type          | <input type="text"/> min <input type="text"/> sec |

A1-5) [use amount and spraying time] mean used amount and (or) spraying time per use? (문1-1에서 선택한 모든 제품 유형 필수 응답)

\* routine(normal) use in workplace or occupation place (일반적인 사용을 기준으로 응답해 주세요.)

| application types      | questions                                                                        | factors                                                     |
|------------------------|----------------------------------------------------------------------------------|-------------------------------------------------------------|
| ① liquid type          | how many liquor cup(about 50ml) did you used per one use?                        | ① 0.5 cup ② 1cup ③ 1.5cup ④ 2cup ⑤ 2.5cup ⑥ 3cup more( )cup |
| ② spray type (trigger) | number of triggering actions for disinfecting task to kitchen place per one use? | mean <input type="text"/> times                             |
| ③ powder type          | how many spoon(tea spoon) did you used per one use?                              | mean <input type="text"/> spoon                             |
